# Supplementary material
Source: PubMed Central journal article supplement (PMC5014062)
Supplement: rsif20160355supp1.pdf [file rsif20160355supp1.pdf]

1 **Supporting information**

2 **Controlled cobalt doping in the spinel structure of magnetosome magnetite: New**  
3 **evidences from element- and site-specific XMCD analyses**

4

5 Jinhua Li, Nicolas Menguy, Marie-Anne Arrio, Philippe Saintavit, Amélie Juhin, Yinzhao

6 Wang, Haitao Chen, Oana Bunau, Edwige Otero, Philippe Ohresser, Yongxin Pan

7

8

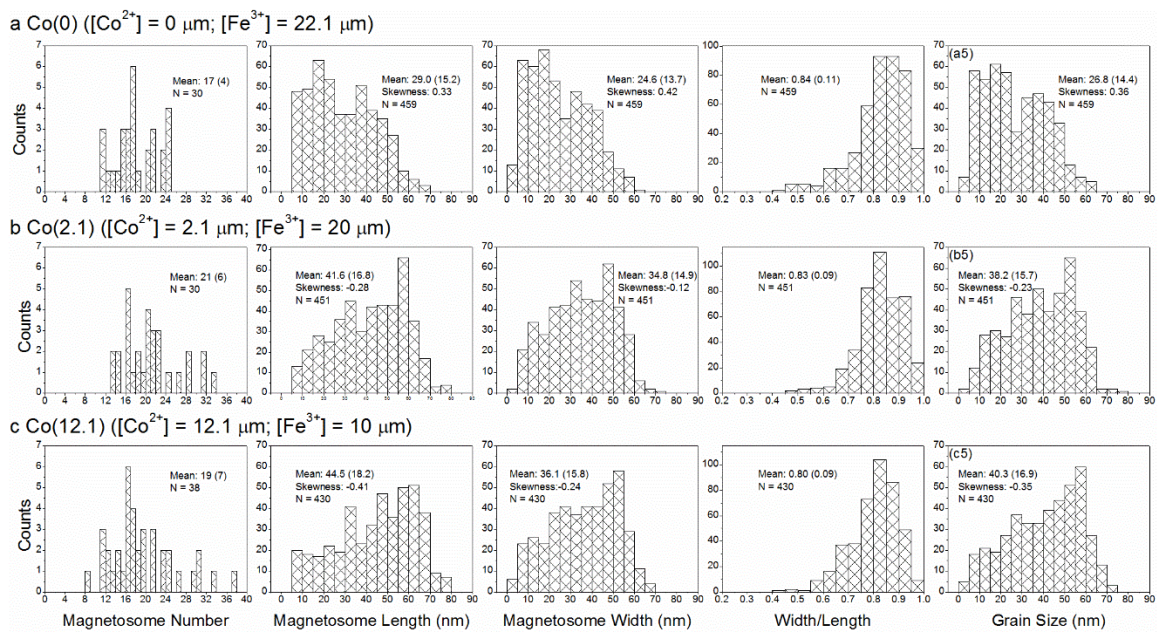

10 Figure S1. Histograms representing counts as a function of magnetosome number (first  
11 column), length (second column), width (third column), shape factor (i.e., width/length,  
12 forth column), and grain size ((length+width)/2, fifth column) for magnetosomes produced  
13 by AMB-1 cells within the Co(0) (a), Co(2.1) (b), and Co(12.1) (c) cultures.

14

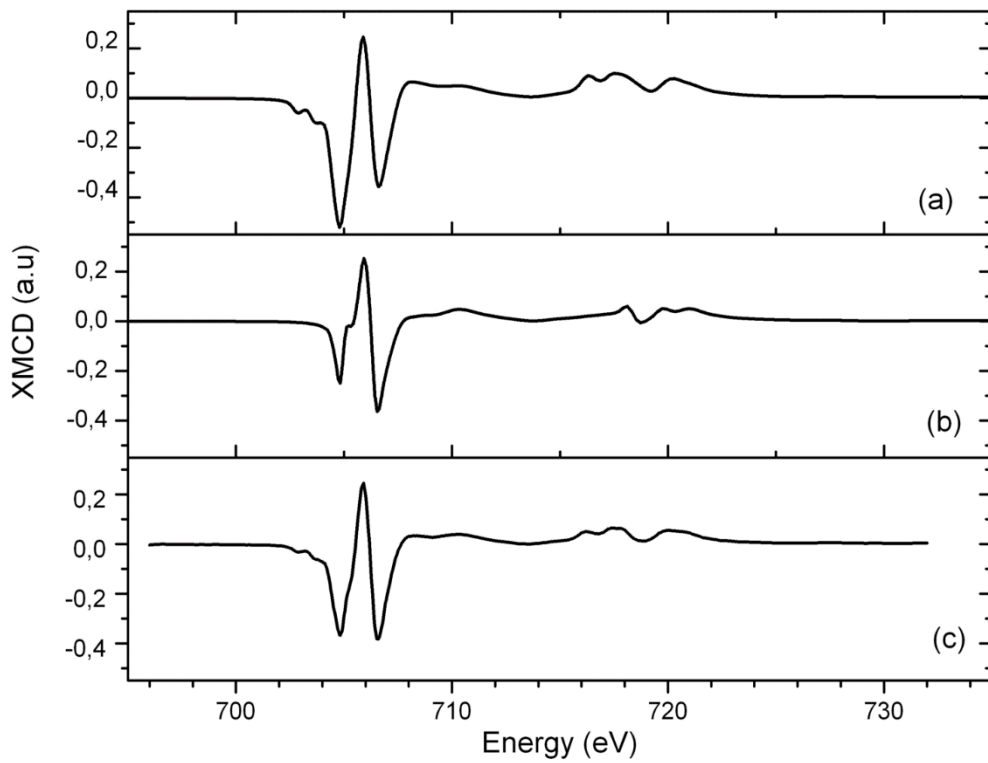

15

16 Figure S2. Experimental XMCD signals at Fe  $L_{2,3}$  edges for (a) pure magnetite, (b) pure  
17 maghemite, (c) Co(12.1) sample

18

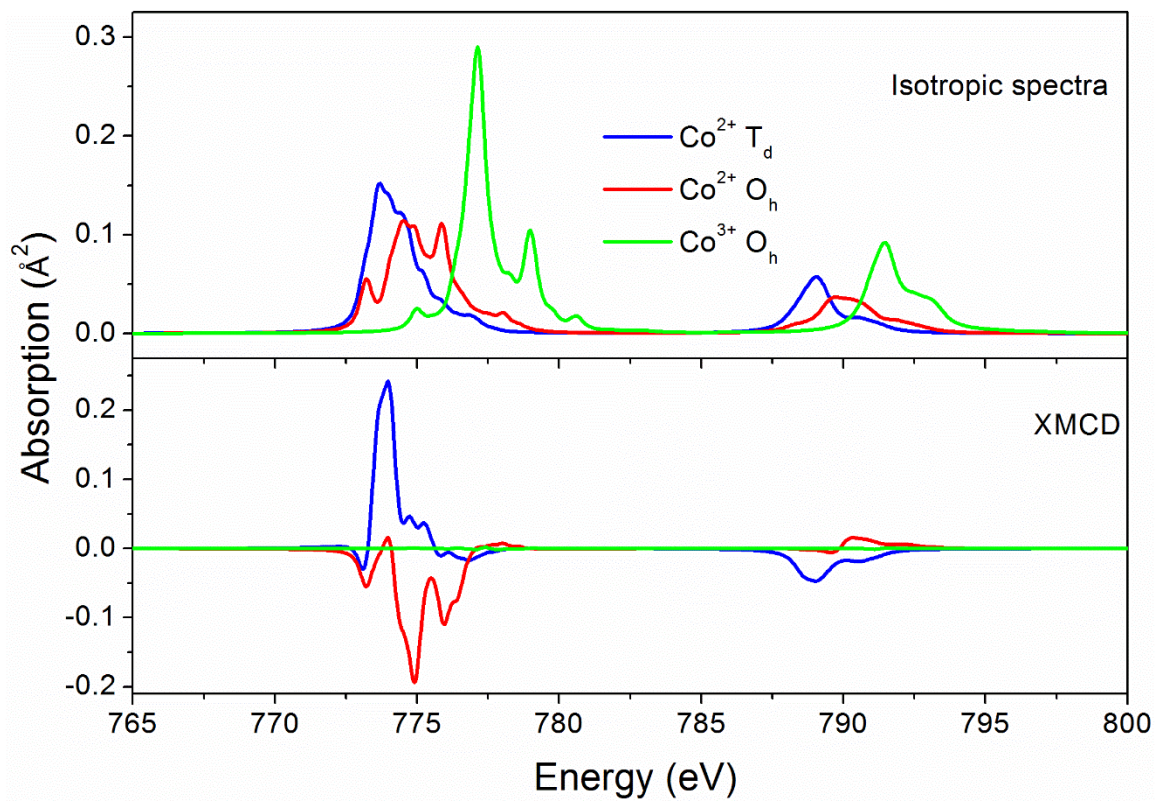

19

20 Figure S3. Calculated XAS and XMCD spectra for  $\text{Co}^{2+}$  and  $\text{Co}^{3+}$  in octahedral and  
 21 tetrahedral coordinations.

22

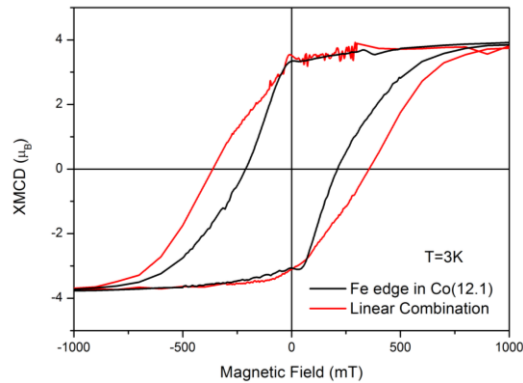

23

24 Figure S4. Magnetization curve (red line) calculated for a weighted average of the  
 25 magnetization curves measured on the Co(0) magnetosomes at the Fe  $L_{2,3}$  edges and on the  
 26 Co(12.1) magnetosomes at the Co  $L_{2,3}$  edges compared to the magnetization curve of the  
 27 Co(12.1) sample (black line) at the Fe  $L_{2,3}$  edges. Both curves are plotted in absolute units  
 28 ( $\mu_B$ ) where we assumed  $5 \mu_B$  for  $Fe^{3+}$  ions,  $4 \mu_B$  for  $Fe^{2+}$  ions and  $3 \mu_B$  for  $Co^{2+}$  ions. From  
 29 the comparison of the magnetization curves measured at the Fe and the Co edges in the  
 30 Co(12.1) sample, we can conclude that there is more than one type of magnetosomes. For  
 31 instance, the remanent magnetization  $M_r$  at the Fe edge is 82% of the saturation  
 32 magnetization  $M_s$ , while at the Co edge  $M_r/M_s$  is 89 %. This represents a relative increase  
 33 in  $M_r/M_s$  of  $\sim 10\%$ . One assumes that there are, on one side, magnetite particles (slightly  
 34 oxidized as in Co(0) sample) and, on the other side, Co-bearing nanospinels where Co /  
 35 Fe+Co = 6 %. If the distribution of Co in the latter is homogeneous between the core and  
 36 the surface, then the magnetization curve of Co in Co(12.1) is representative of the  
 37 magnetization curve of the Co-bearing particles. From what precedes, one concludes that  
 38 the magnetization of Fe in Co(12.1) should be the weighted sum of 10% of Fe  
 39 magnetization in Co(0) and 90% of Co magnetization in Co(12.1). As expected, the  
 40 remnant magnetizations of both curves are the same, but the coercive fields are very  
 41 different, with a larger coercive field for the linear combination. This indicates that Co is  
 42 not homogeneously distributed within the Co(12.1) particles. We guess that the Co  
 43 concentration is higher close to the surface compared to the core, and surface anisotropy  
 44 adds to the magneto-crystalline anisotropy of cobalt.

45

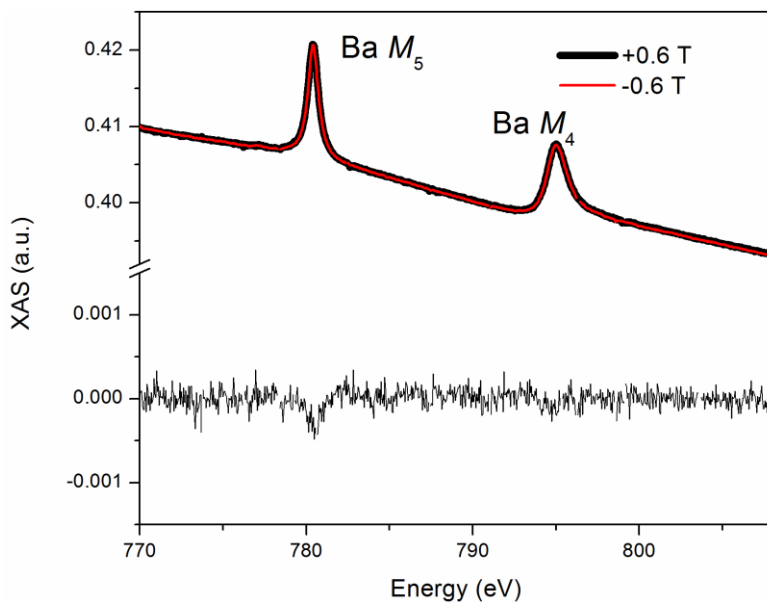

46  
 47 Figure S5. XAS spectra of the Si wafer on which the magnetosome samples have been  
 48 prepared. X-rays are circularly left polarized. Black thick curve is for +0.6T external  
 49 magnetic field and thin red curve is for -0.6T external magnetic field. Features at 780 eV  
 50 and 795 eV are due to the  $M_{4,5}$  edges of Ba impurities present in the silicon wafer. The thin  
 51 black line is the XAS difference for the two opposite magnetic fields. As expected, the  
 52 difference is less than 3% of the Ba XAS spectrum and Ba impurities do not contribute to  
 53 any significant XMCD signal.  
 54

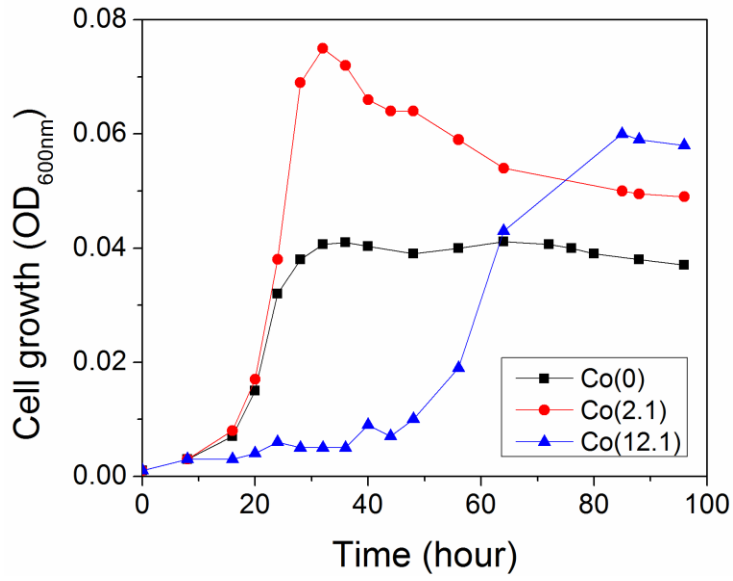

55

56 Figure S6. Temporal variations of cell growth (OD<sub>600</sub>) of AMB-1 within the Co(0), Co(2.1)  
57 and Co(12.1) cultures.

58

59
